# Supplementary figures and images for: Pinobanksin ameliorated DSS-induced acute colitis mainly through modulation of SLC7A11/glutathione-mediated intestinal epithelial ferroptosis
Source: Royal Society of Chemistry journal article supplement (doi:10.1039/d3fo04500e), 2024-01-01

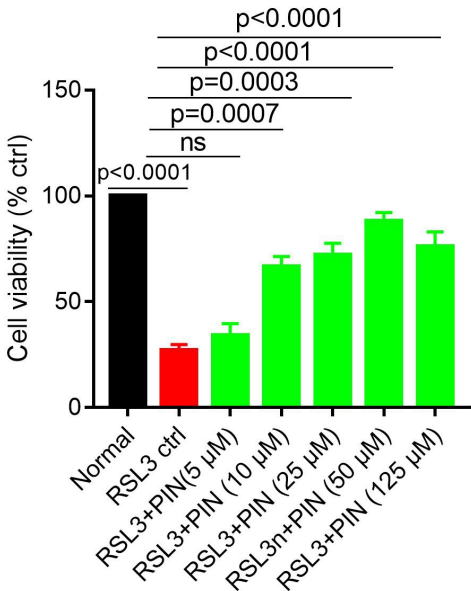

Supplement: d3fo04500e1.pdf [file d3fo04500e1.pdf]
